# Supplementary material
Source: PubMed Central journal article supplement (PMC3707538)
Supplement: supp_pp.113.220657_220657Supp_Fig._S1_Plant_Phys_resubmission.pdf [file supp_pp.113.220657_220657Supp_Fig._S1_Plant_Phys_resubmission.pdf]

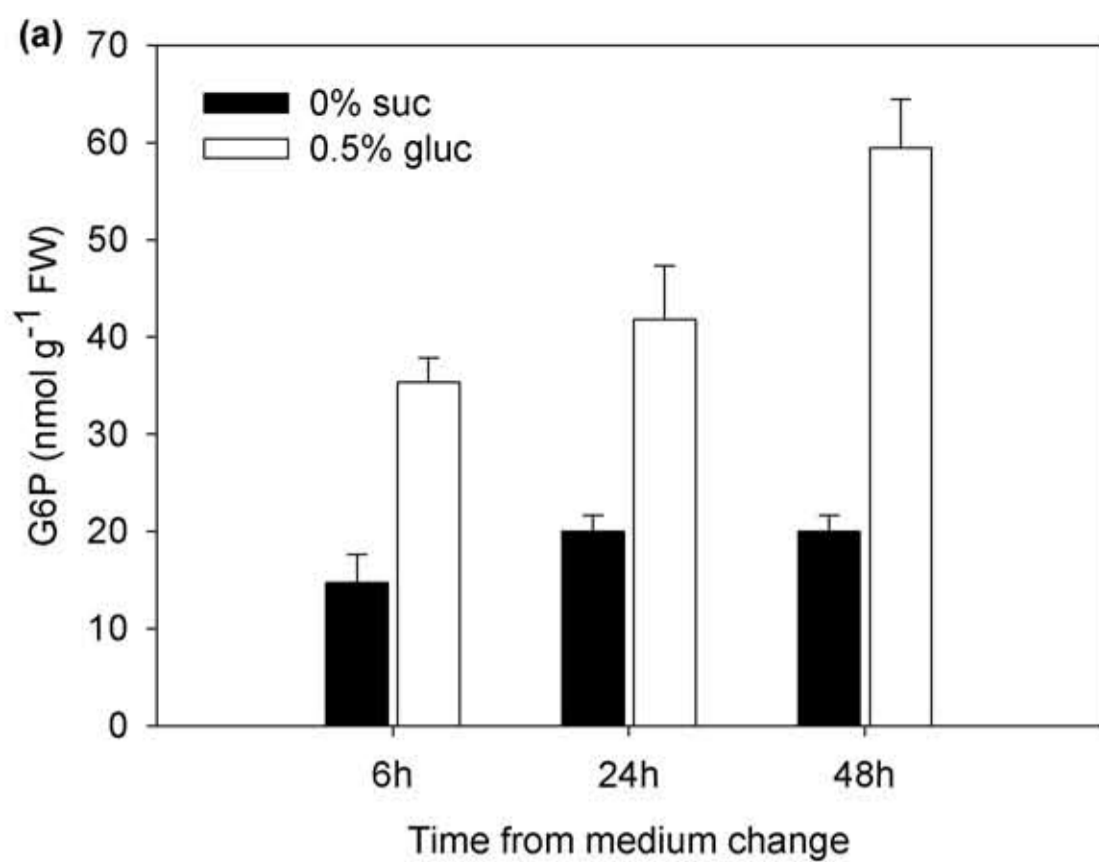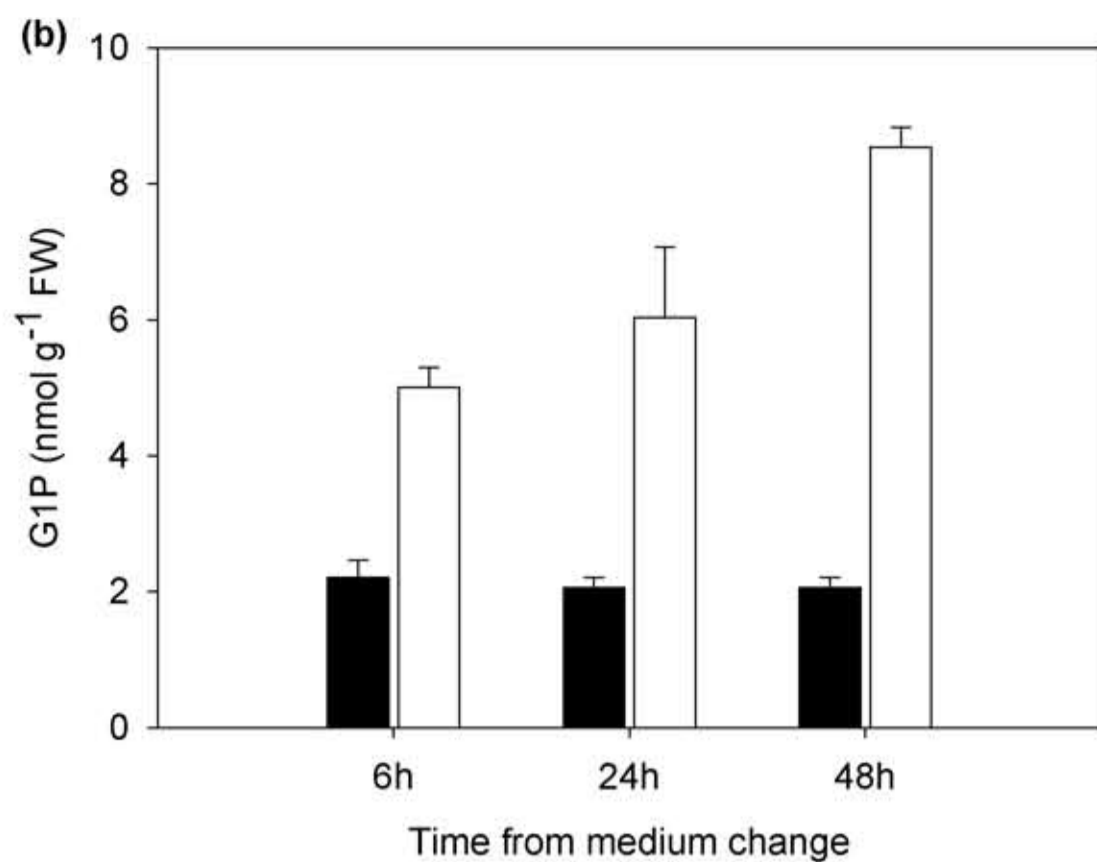

**Supplementary Fig. 1** G6P and G1P accumulation in response to glucose feeding. (a), G6P and (b), G1P compared to the starvation control. Data are averages with standard deviations of 3 independent samples.
