# Supplementary material
Source: PubMed Central journal article supplement (PMC3707538)
Supplement: supp_pp.113.220657_220657Supp_Fig._S2_Plant_Phys_resubmission.pdf [file supp_pp.113.220657_220657Supp_Fig._S2_Plant_Phys_resubmission.pdf]

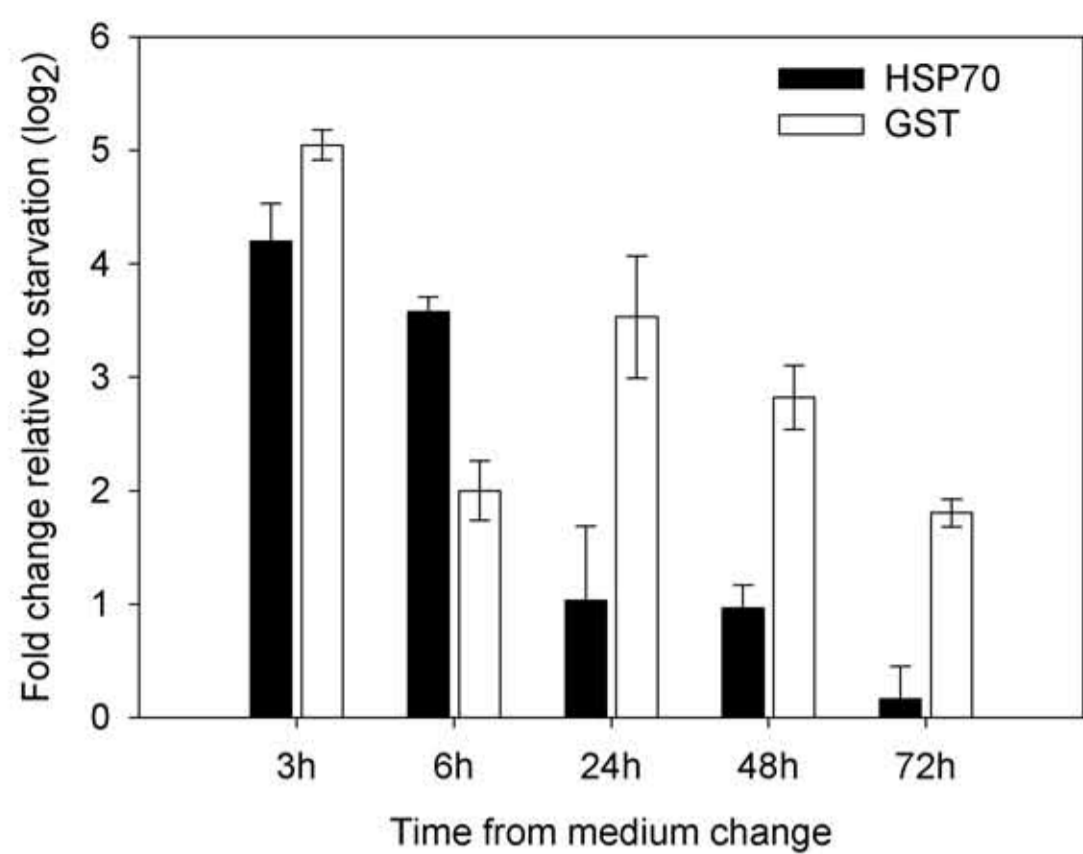

**Supplementary Fig. 2** Transcript abundance of glucose marker genes determined by qRT-PCR in response to glucose feeding relative to starvation condition (HSP70, At3g12580 and GST, At1g17170). Data are averages with standard deviations of 3 independent samples.
