# Supplementary material
Source: PubMed Central journal article supplement (PMC3707538)
Supplement: supp_pp.113.220657_220657Supp_Fig._S3_Plant_Phys_resubmission.pdf [file supp_pp.113.220657_220657Supp_Fig._S3_Plant_Phys_resubmission.pdf]

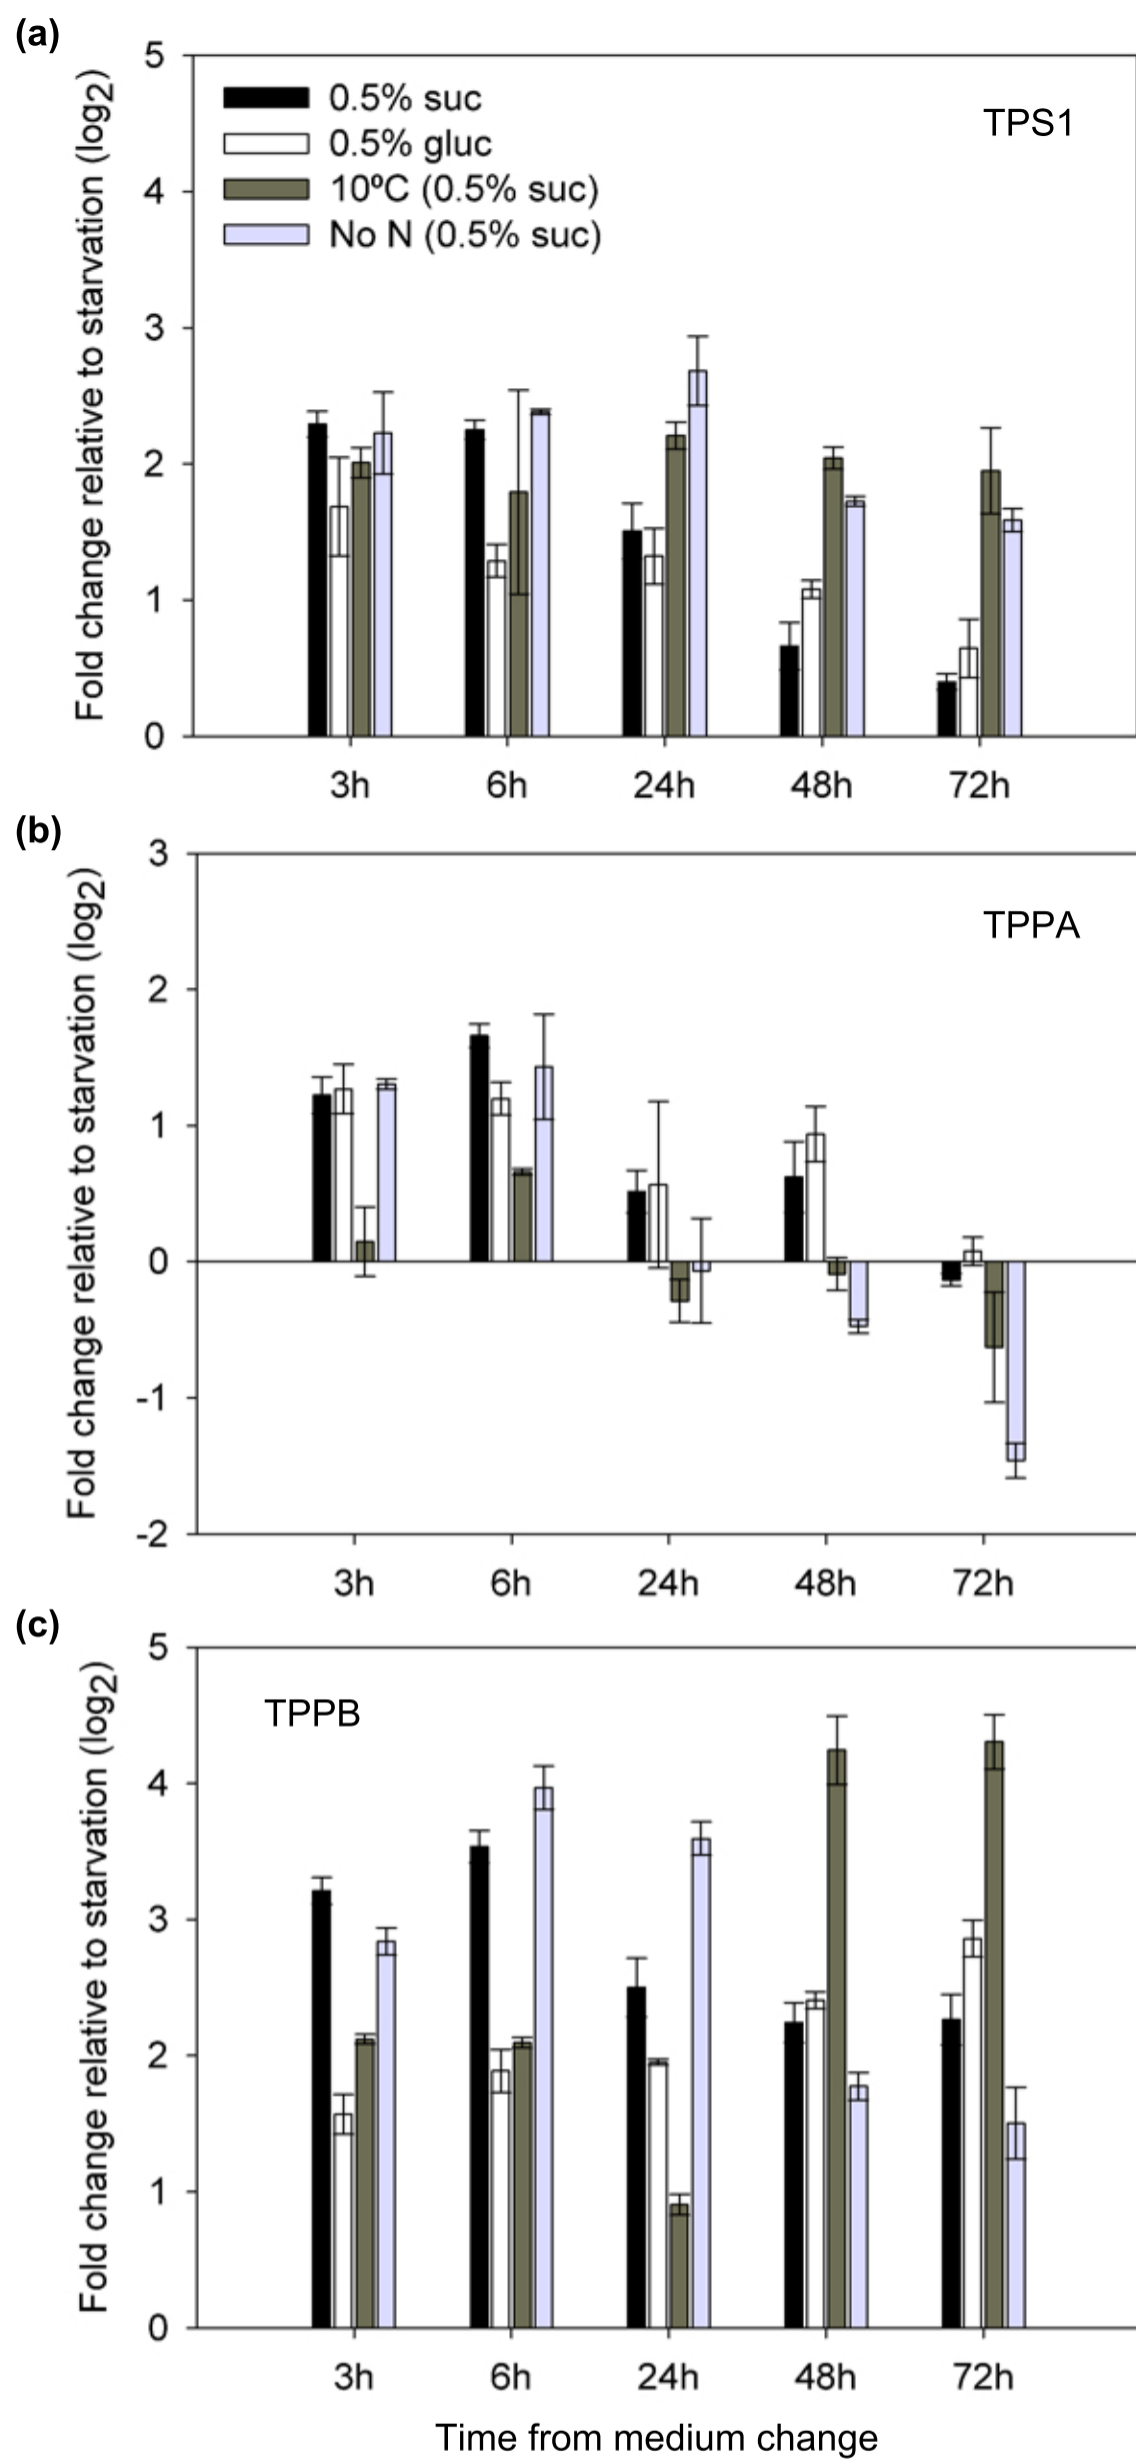

**Supplementary Fig. 3** Transcript abundance of trehalose pathway genes determined by qRT-PCR in response to sucrose and glucose feeding with full nutrition at 22°C and after transfer to 10°C or zero nitrogen relative to starvation conditions without external carbon source. Transcript fold change of (a), TPS1 (At1g78580); (b), TPPA (At5g51460) and (c), TPPB (At1g78090) relative to the starvation condition at 3, 6, 24, 48 and 72 h after treatment induction. The data are means with standard deviations of 3 independent samples.
