# Supplementary material
Source: PubMed Central journal article supplement (PMC3707538)
Supplement: supp_pp.113.220657_220657Supp_Fig._S4_Plant_Phys_resubmission.pdf [file supp_pp.113.220657_220657Supp_Fig._S4_Plant_Phys_resubmission.pdf]

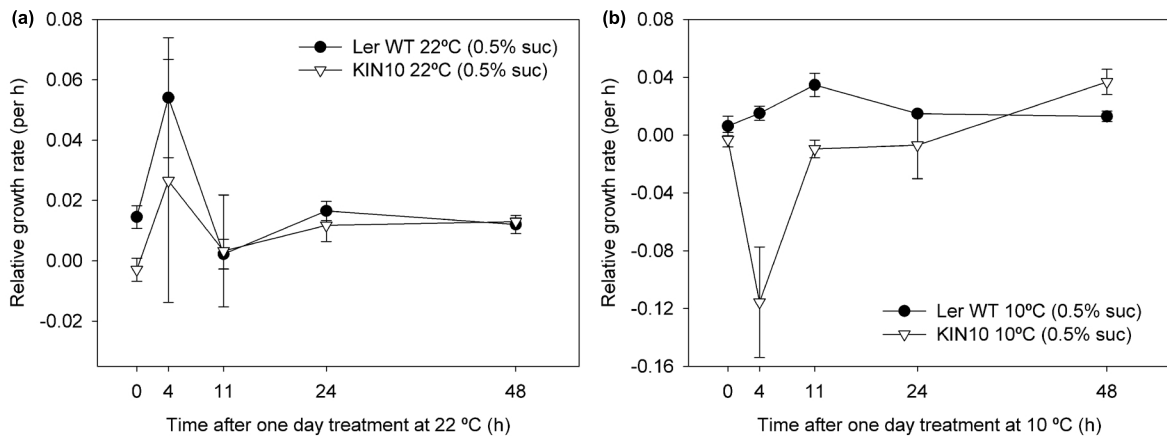

**Supplementary Fig. 4** Relative growth rate calculated from dry weight of WT Ler compared to KIN10 seedlings (a), maintained at 22°C or (b), transferred from 10°C. Seedlings were grown with 0.5% sucrose for 7 days at 22°C, either transferred to 10°C for 24 h (10°C) and then back to 22°C or held at 22°C throughout (22°C). All growth measurements were performed at 22°C. The data are means with standard errors of 3 independent samples.
